# Supplementary material for: Knowledge and attitude towards HIV/AIDS in India: A systematic review and meta-analysis of 47 studies from 2010-2020
Source: PubMed Central journal article supplement (PMC8233681; doi:10.34172/hpp.2021.19), 2021-05-19

## Supplementary file 1

**Table S1. Search strategy**

| PubMed/Medline                                                                                                                                                                                                                                                                                                                                                                                                                                                                                                                                                                                                                                                                                                                                                                                                                                                                                                  | Scopus                                                                                                                                                                                                                                                                                                                                                                                                                                                                                             | Embase                                                                                                                                                                                                                                                                                                                                                        | Google scholar                                                                                                                                                                                                                                  |
|-----------------------------------------------------------------------------------------------------------------------------------------------------------------------------------------------------------------------------------------------------------------------------------------------------------------------------------------------------------------------------------------------------------------------------------------------------------------------------------------------------------------------------------------------------------------------------------------------------------------------------------------------------------------------------------------------------------------------------------------------------------------------------------------------------------------------------------------------------------------------------------------------------------------|----------------------------------------------------------------------------------------------------------------------------------------------------------------------------------------------------------------------------------------------------------------------------------------------------------------------------------------------------------------------------------------------------------------------------------------------------------------------------------------------------|---------------------------------------------------------------------------------------------------------------------------------------------------------------------------------------------------------------------------------------------------------------------------------------------------------------------------------------------------------------|-------------------------------------------------------------------------------------------------------------------------------------------------------------------------------------------------------------------------------------------------|
| ((((((("knowledge"[MeSH Terms] OR "knowledge"[All Fields]) OR "knowledge s"[All Fields]) OR "knowledgeability"[All Fields]) OR "knowledgeable"[All Fields]) OR "knowledgeably"[All Fields]) OR "knowledges"[All Fields]) AND (((("attitude"[MeSH Terms] OR "attitudes"[All Fields]) OR "attitude s"[All Fields]) AND (((((((("practicability"[All Fields] OR "practicable"[All Fields]) OR "practical"[All Fields]) OR "practicalities"[All Fields]) OR "practicality"[All Fields]) OR "practically"[All Fields]) OR "practicals"[All Fields]) OR "practice"[All Fields]) OR "practice s"[All Fields]) OR "practiced"[All Fields]) OR "practices"[All Fields]) OR "practicing"[All Fields]) AND ("curr opin hiv aids"[Journal] OR ("hiv"[All Fields] AND "aids"[All Fields])) OR "hiv aids"[All Fields]) AND (((("india"[MeSH Terms] OR "india"[All Fields]) OR "india s"[All Fields]) OR "indias"[All Fields]) | (ALL(Knowledge attitude practice HIV AIDS India) AND ( LIMIT-TO ( PUBYEAR,2020) OR LIMIT-TO ( PUBYEAR,2019) OR LIMIT-TO ( PUBYEAR,2018) OR LIMIT-TO ( PUBYEAR,2017) OR LIMIT-TO ( PUBYEAR,2016) OR LIMIT-TO ( PUBYEAR,2015) OR LIMIT-TO ( PUBYEAR,2014) OR LIMIT-TO ( PUBYEAR,2013) OR LIMIT-TO ( PUBYEAR,2012) OR LIMIT-TO ( PUBYEAR,2011) OR LIMIT-TO ( PUBYEAR,2010) ) AND ( LIMIT-TO ( EXACTKEYWORD,"Human" ) OR LIMIT-TO ( EXACTKEYWORD,"Article" ) ) AND ( LIMIT-TO ( LANGUAGE,"English" ))) | (('knowledge attitude practice hiv aids india' OR (('knowledge'/exp OR knowledge) AND ('attitude'/exp OR attitude) AND ('practice'/exp OR practice) AND ('hiv'/exp OR hiv) AND ('aids'/exp OR aids) AND ('india'/exp OR india))) AND india OR 'cross-sectional study') AND english:la AND knowledge AND attitude AND practice AND india:ca AND [2010-2020]/py | "hiv" OR "human immunodeficiency virus" AND "aids" OR "acquired immunodeficiency virus syndrome" AND "cross sectional" "india" KNOWLEDGE OR "ATTITUDE" OR "PRACTICE" OR "behavior""knowledge" "attitude" "practice" "questionnaire" OR "survey" |

**Table S2. List of excluded studies and reasons for exclusion**

| <b>Article</b>                                                                                                                                                                                | <b>Reason</b>          |
|-----------------------------------------------------------------------------------------------------------------------------------------------------------------------------------------------|------------------------|
| Knowledge and attitude of Basic Health Workers (BHWs) toward HIV/AIDS                                                                                                                         | Not in India           |
| South Asian migrant women and HIV/STIs: knowledge, attitudes and practices and the role of sexual power                                                                                       | Not in India           |
| Knowledge and practices related to sexually transmitted infections and HIV among sex workers in an urban area of Gujarat, India                                                               | Full-text not accessed |
| Knowledge and Perception among Medical Students towards People with HIV and AIDS                                                                                                              | Full-text not accessed |
| Knowledge, Attitudes and Practices Towards HIV/AIDS in General Population Covered by Urban Health Training Centre, Hapur                                                                      | Full-text not accessed |
| A Study of Knowledge Regarding HIV/AIDS among the High School Teachers in Tumkur Taluk, Karnatka                                                                                              | Full-text not accessed |
| Comprehensive Knowledge on Dental Management of HIV/AIDS: A Survey on Private Sector Oral Health Care Providers in Andhra Pradesh                                                             | Full-text not accessed |
| Perceptions about training and knowledge of HIV/AIDS ethics among healthcare providers                                                                                                        | Full-text not accessed |
| Knowledge, attitude, and perception of disease among persons living with human immunodeficiency virus/acquired immuno deficiency syndrome: A study from a tertiary care center in North India | Duplicate article      |
| Knowledge of human immunodeficiency virus, attitudes, and willingness to conduct human immunodeficiency virus testing among Indian dentists                                                   | Duplicate article      |
| Knowledge and attitude about HIV/AIDS among HIV-positive individuals in Davangere                                                                                                             | Duplicate article      |
| Knowledge and awareness of HIV/AIDS among students of a technical institution                                                                                                                 | Duplicate article      |
| Knowledge and attitudes about HIV/AIDS of students in HP Government Dental College and Hospital, Shimla, India                                                                                | Duplicate article      |
| Knowledge, attitude, and behavior in managing patients with HIV/AIDS among a group of Indian dental students                                                                                  | Duplicate article      |



## Figure S2. Sensitivity analysis

### a. Knowledge about HIV/AIDS

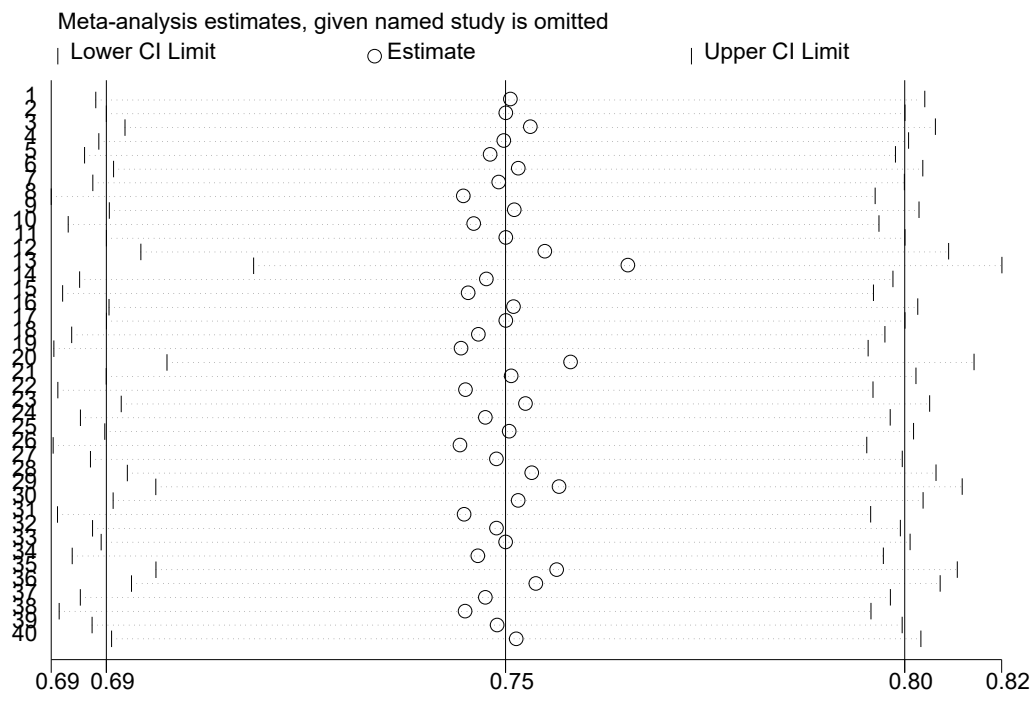

### b. Attitude towards HIV/AIDS

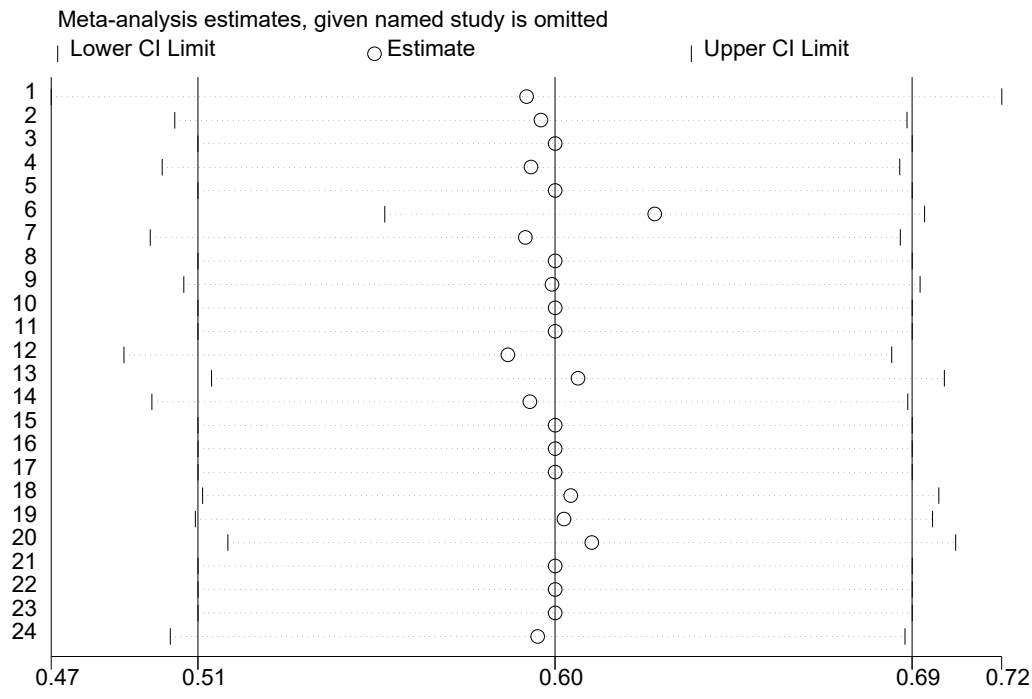

### Figure S3. Trim and Fill Publication bias

a. knowledge about HIV/AIDS

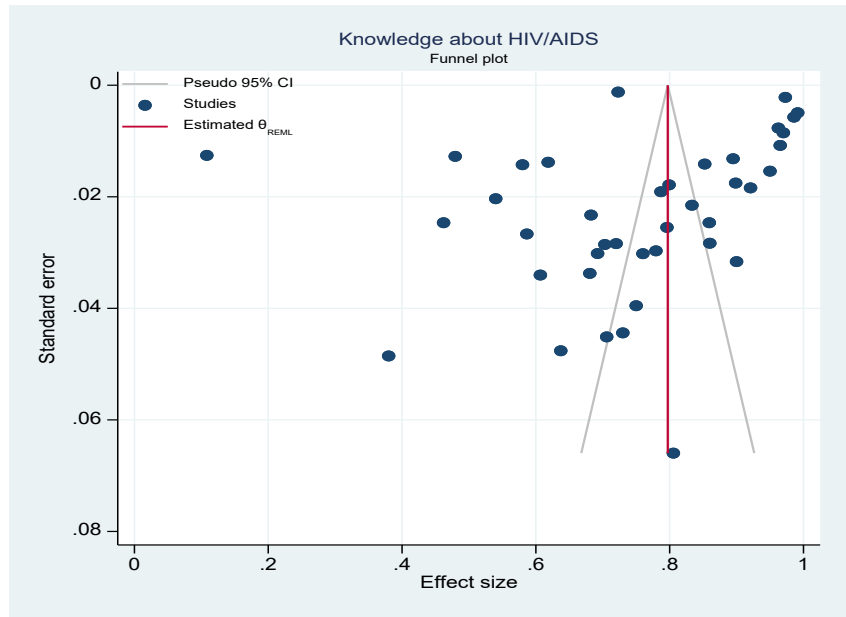

b. Attitude towards HIV/AIDS

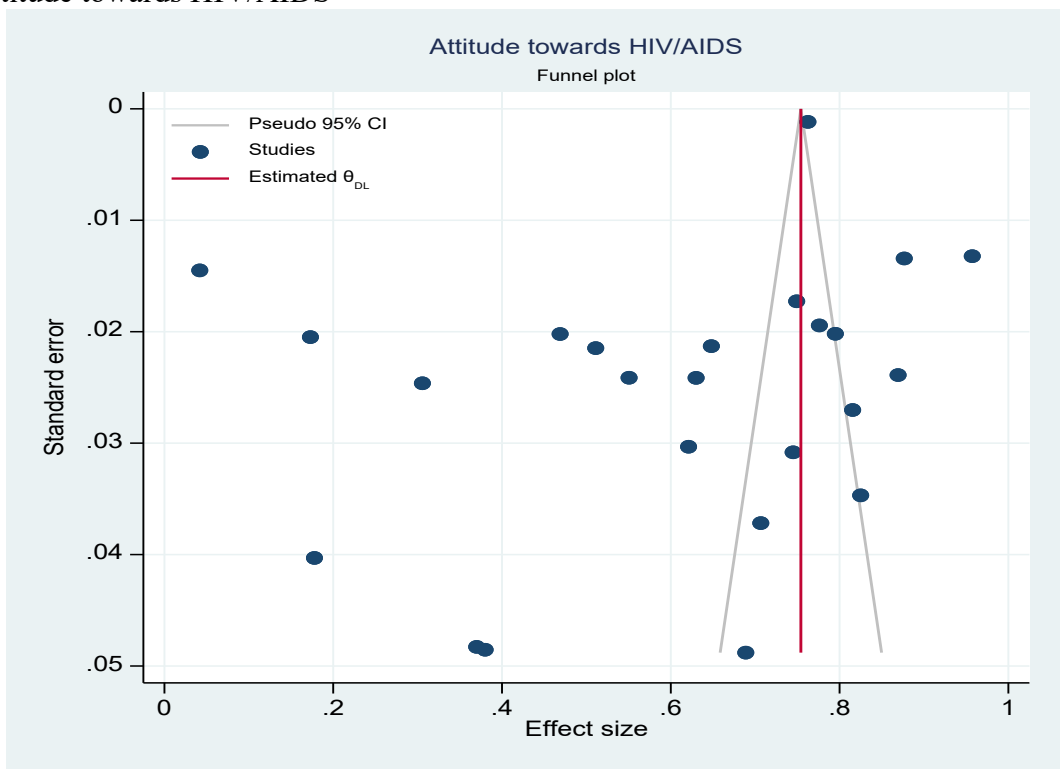

Supplement: hpp-11-148-s001.pdf [file hpp-11-148-s001.pdf]
